# Supplementary material
Source: PubMed Central journal article supplement (PMC2878254)
Supplement: supp_85.6.512_BoganCorrection.pdf [file supp_85.6.512_BoganCorrection.pdf]

## **CORRECTION**

**Missing page in the print version but online version is complete:** In the Original Article entitled “Long-term Maintenance Treatment of Restless Legs Syndrome With Gabapentin Enacarbil: A Randomized Controlled Study,” which was published in the June 2010 issue of *Mayo Clinic Proceedings* (*Mayo Clin Proc.* 2010;85(6):512-521), page 520 is missing from the print version and page 518 is printed twice. However, the version on our Web site is correct and complete.
