# Supplementary material
Source: PubMed Central journal article supplement (PMC2878254)
Supplement: supp_85.6.512_Boganetables.pdf [file supp_85.6.512_Boganetables.pdf]

## Supplementary Online Content

Bogan RK, Cramer Bornemann MA, Kushida CA, Trân PV, Barrett RW; XP060 Study Group. Long-term maintenance treatment of restless legs syndrome with gabapentin enacarbil: a randomized controlled study. *Mayo Clin Proc.* 2010;85(6):512-521.

**eTABLE 1.** Post-Sleep Questionnaire Responses at Single-Blind and Double-Blind Baselines for the Intent-to-Treat Populations

**eTABLE 2.** Treatment-Emergent Adverse Events Occurring During the 2-Week Taper Phase Between Weeks 24 and 26 in the Double-Blind Safety Population

This supplementary material has been peer reviewed, edited, and approved by the authors.

eTABLE 1. **Post-Sleep Questionnaire Responses at Single-Blind and Double-Blind Baselines for the Intent-to-Treat Populations<sup>a</sup>**

|                                                                         | No. (%) of patients                                         |                    |                                      |
|-------------------------------------------------------------------------|-------------------------------------------------------------|--------------------|--------------------------------------|
|                                                                         | Single-blind phase of gabapentin enacarbil, 1200 mg (n=311) | Double-blind phase |                                      |
|                                                                         |                                                             | Placebo (n=97)     | Gabapentin enacarbil, 1200 mg (n=96) |
| Item 1: overall quality of sleep in past week                           |                                                             |                    |                                      |
| Excellent                                                               | 3 (1.0)                                                     | 38 (39)            | 43 (45)                              |
| Reasonable                                                              | 97 (31.2)                                                   | 56 (58)            | 46 (48)                              |
| Poor                                                                    | 211 (67.8)                                                  | 3 (3)              | 7 (7)                                |
| Item 2: ability to function in past week                                |                                                             |                    |                                      |
| Excellent                                                               | 20 (6.4)                                                    | 53 (55)            | 63 (66)                              |
| Good                                                                    | 124 (39.9)                                                  | 42 (43)            | 28 (29)                              |
| Moderate                                                                | 141 (45.3)                                                  | 2 (2)              | 4 (4)                                |
| Poor                                                                    | 26 (8.4)                                                    | 0                  | 1 (1)                                |
| Item 3: No. of nights with RLS symptoms in past week                    |                                                             |                    |                                      |
| 0 <sup>b</sup>                                                          | 1 (0.3)                                                     | 47 (48)            | 38 (40)                              |
| 1-2                                                                     | 1 (0.3)                                                     | 35 (36)            | 36 (38)                              |
| 3-4                                                                     | 36 (11.6)                                                   | 8 (8)              | 11 (11)                              |
| 5-6                                                                     | 122 (39.2)                                                  | 3 (3)              | 5 (5)                                |
| 7                                                                       | 151 (48.6)                                                  | 4 (4)              | 6 (6)                                |
| Item 4: No. of awakenings during night in past week due to RLS symptoms |                                                             |                    |                                      |
| 0 <sup>b</sup>                                                          | 26 (8.4)                                                    | 73 (75)            | 72 (75)                              |
| 1-2                                                                     | 131 (42.1)                                                  | 22 (23)            | 22 (23)                              |
| 3-4                                                                     | 113 (36.3)                                                  | 2 (2)              | 1 (1)                                |
| ≥5                                                                      | 41 (13.2)                                                   | 0                  | 1 (1)                                |
| Item 5: No. of hours awake per night in past week due to RLS symptoms   |                                                             |                    |                                      |
| 0 <sup>b</sup>                                                          | 1 (0.3)                                                     | 47 (48)            | 38 (40)                              |
| <1                                                                      | 89 (28.6)                                                   | 38 (39)            | 48 (50)                              |
| 1 to <2                                                                 | 114 (36.7)                                                  | 8 (8)              | 6 (6)                                |
| 2 to <3                                                                 | 66 (21.2)                                                   | 2 (2)              | 4 (4)                                |
| ≥3                                                                      | 41 (13.2)                                                   | 2 (2)              | 0                                    |

<sup>a</sup> RLS = restless legs syndrome.

<sup>b</sup> If a patient answered 0 to item 3, then his/her answers to items 4 and 5 were 0 times and 0 hours, respectively.

eTABLE 2. Treatment-Emergent Adverse Events Occurring During the 2-Week Taper Phase Between Weeks 24 and 26 in the Double-Blind Safety Population<sup>a</sup>

| Adverse event                     | Placebo <sup>b</sup> (n=98) | Gabapentin enacarbil, 1200 mg (n=96) |
|-----------------------------------|-----------------------------|--------------------------------------|
| Any                               | 28 (29)                     | 18 (19)                              |
| Tremor                            | 3 (3)                       | 2 (2)                                |
| Anxiety                           | 1 (1)                       | 1 (1)                                |
| Arthralgia                        | 0                           | 1 (1)                                |
| Cough                             | 0                           | 1 (1)                                |
| Diarrhea                          | 0                           | 1 (1)                                |
| Headache                          | 2 (2)                       | 1 (1)                                |
| Incontinence                      | 0                           | 1 (1)                                |
| Increased blood creatine kinase   | 0                           | 1 (1)                                |
| Increased lacrimation             | 0                           | 1 (1)                                |
| Increased mean cell volume        | 0                           | 1 (1)                                |
| Increased monocyte count          | 0                           | 1 (1)                                |
| Middle-of-the-night insomnia      | 0                           | 1 (1)                                |
| Nasopharyngitis                   | 0                           | 1 (1)                                |
| Nausea                            | 1 (1)                       | 1 (1)                                |
| Nystagmus                         | 1 (1)                       | 1 (1)                                |
| Positive urine leukocyte esterase | 0                           | 1 (1)                                |
| Postnasal drip                    | 0                           | 1 (1)                                |
| Sleep terror                      | 0                           | 1 (1)                                |
| Thirst                            | 0                           | 1 (1)                                |
| Upper respiratory tract infection | 1 (1)                       | 1 (1)                                |
| Urinary tract infection           | 0                           | 1 (1)                                |
| Insomnia                          | 2 (2)                       | 0                                    |
| Rash                              | 2 (2)                       | 0                                    |
| Sinusitis                         | 2 (2)                       | 0                                    |
| Viral gastroenteritis             | 2 (2)                       | 0                                    |
| Acute sinusitis                   | 1 (1)                       | 0                                    |
| Right bundle branch block         | 1 (1)                       | 0                                    |
| Constipation                      | 1 (1)                       | 0                                    |
| Depression                        | 1 (1)                       | 0                                    |
| Feeling hot and cold              | 1 (1)                       | 0                                    |
| Glossitis                         | 1 (1)                       | 0                                    |
| Hemoglobinuria                    | 1 (1)                       | 0                                    |
| Migraine                          | 1 (1)                       | 0                                    |
| Muscle spasms                     | 1 (1)                       | 0                                    |
| Paraesthesia                      | 1 (1)                       | 0                                    |
| Restless legs syndrome            | 1 (1)                       | 0                                    |
| Ruptured tendon                   | 1 (1)                       | 0                                    |
| Sunburn                           | 1 (1)                       | 0                                    |
| Tarsal tunnel syndrome            | 1 (1)                       | 0                                    |
| Tendonitis                        | 1 (1)                       | 0                                    |

<sup>a</sup> Data are number (percentage) of adverse events.

<sup>b</sup> Patients in the placebo group received gabapentin enacarbil, 600 mg, during the 2-week taper phase.
